# Supplementary material for: Luminophores of tunable colors from ternary Ag–In–S and quaternary Ag–In–Zn–S nanocrystals covering the visible to near-infrared spectral range
Source: Royal Society of Chemistry journal article supplement (doi:10.1039/c6cp07008f), 2016-12-02
Supplement: c6cp07008f1.pdf [file c6cp07008f1.pdf]

Electronic Supplementary Information

**Luminophores of tunable colors from ternary Ag-In-S and quaternary Ag-In-Zn-S nanocrystals covering visible to near-infrared spectral ranges**

Grzegorz Gabka<sup>a</sup>, Piotr Bujak<sup>a\*</sup>, Kamil Kotwica<sup>a</sup>, Andrzej Ostrowski<sup>a</sup>, Wojciech Lisowski<sup>b</sup>,  
Janusz W. Sobczak<sup>b</sup> and Adam Pron<sup>a</sup>

<sup>a</sup>*Faculty of Chemistry, Warsaw University of Technology, Noakowskiego 3, 00-664 Warsaw, Poland, E-mail: piotrbujakchem@poczta.onet.pl*

<sup>b</sup>*Institute of Physical Chemistry, Polish Academy of Science, Kasprzaka 44/52, 01-224 Warsaw, Poland*

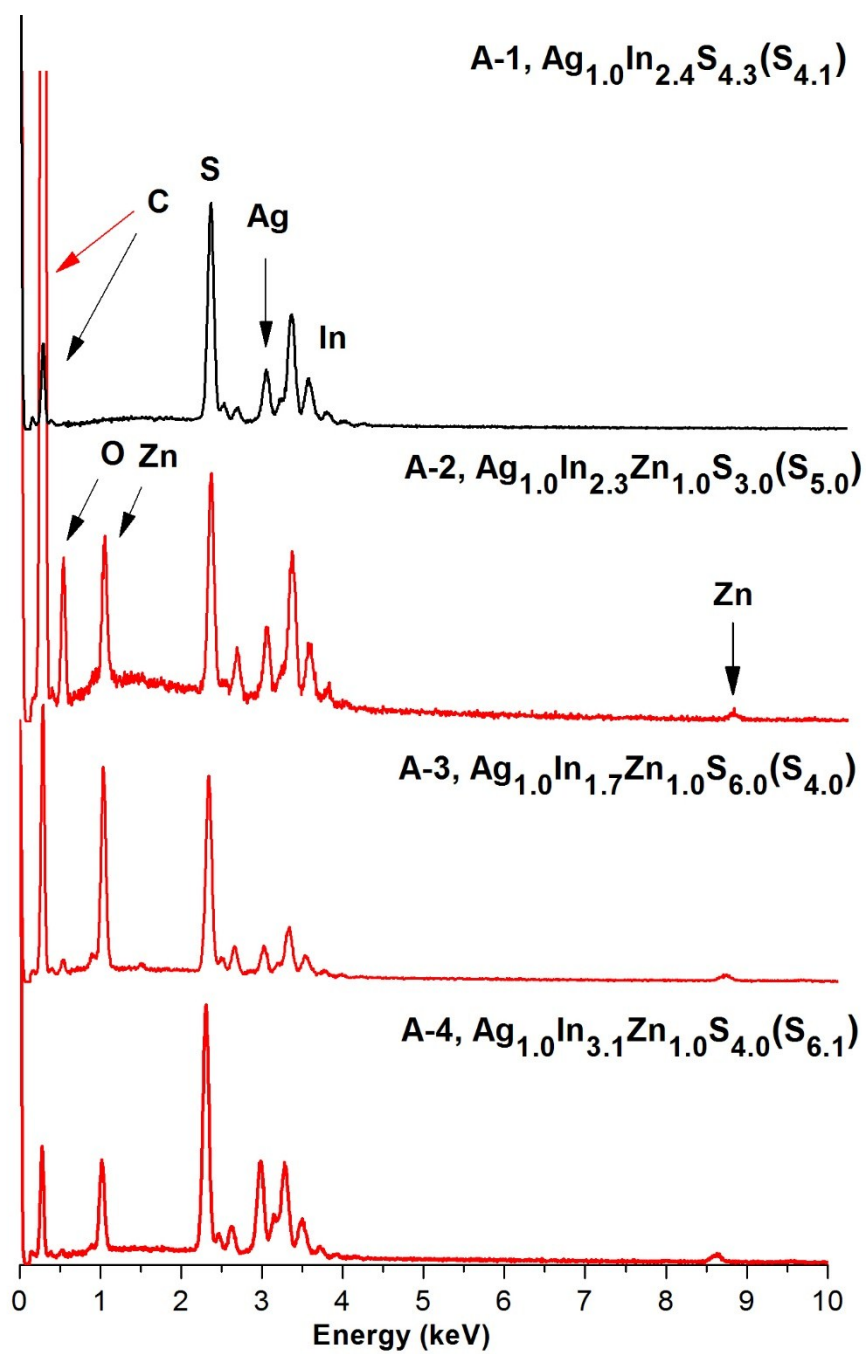

**Fig. S1** Energy-dispersive spectra of Ag-In-S and Ag-In-Zn-S nanocrystals of batches A-(1-4).

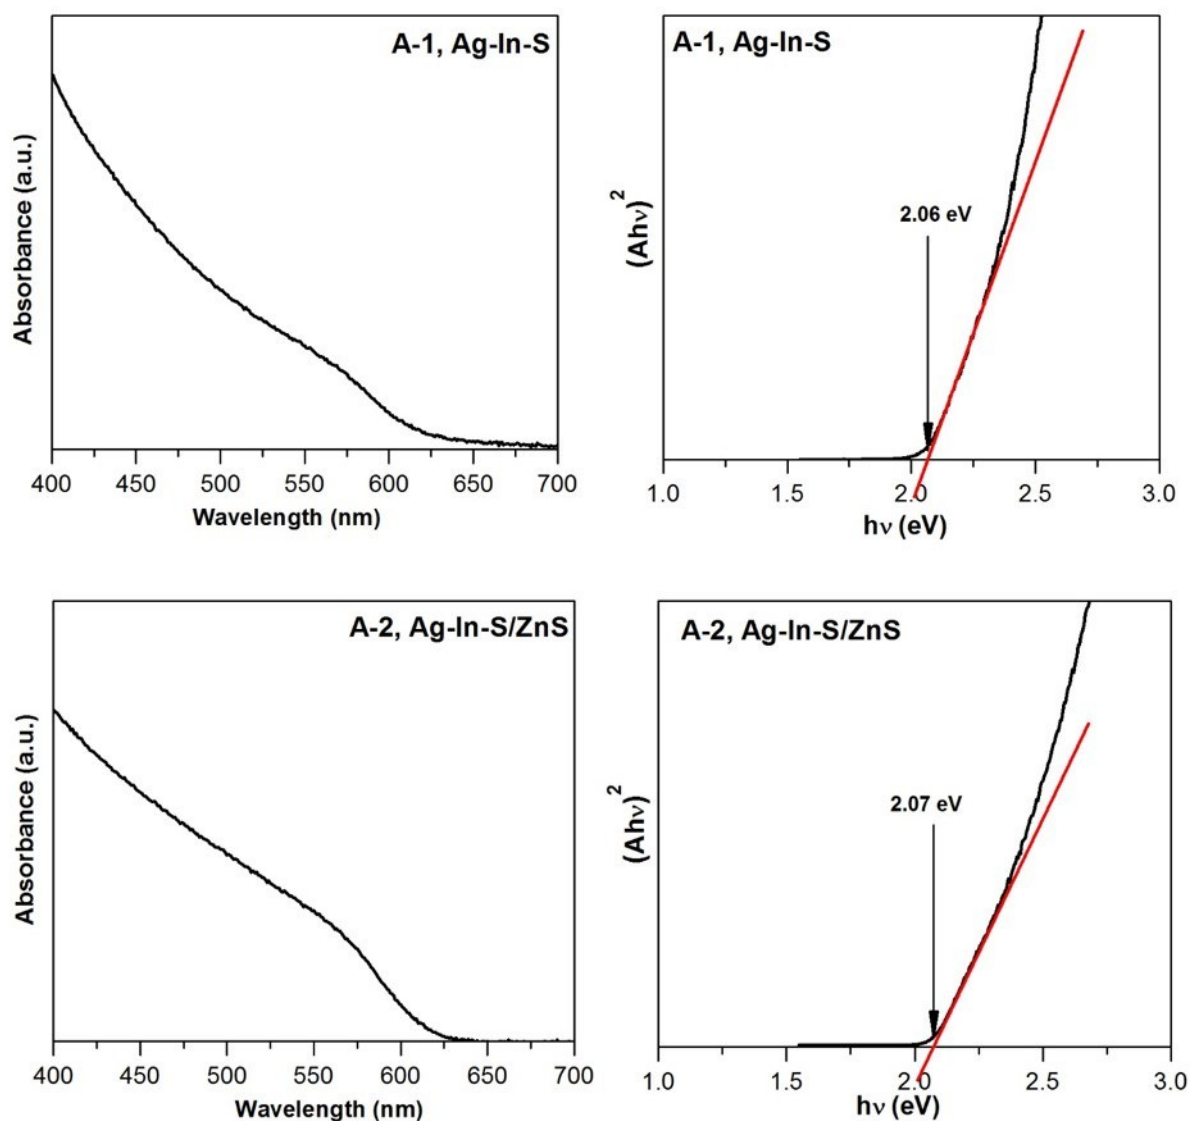

**Fig. S2** Room temperature UV-vis-NIR spectra of hexane dispersion of Ag-In-S (**A-1**) and Ag-In-S/ZnS (**A-2**) nanocrystals and the corresponding  $(Ah\nu)^2$  vs  $h\nu$  curves (where  $A$  = absorbance,  $h$  = Planck's constant and  $\nu$  = frequency).

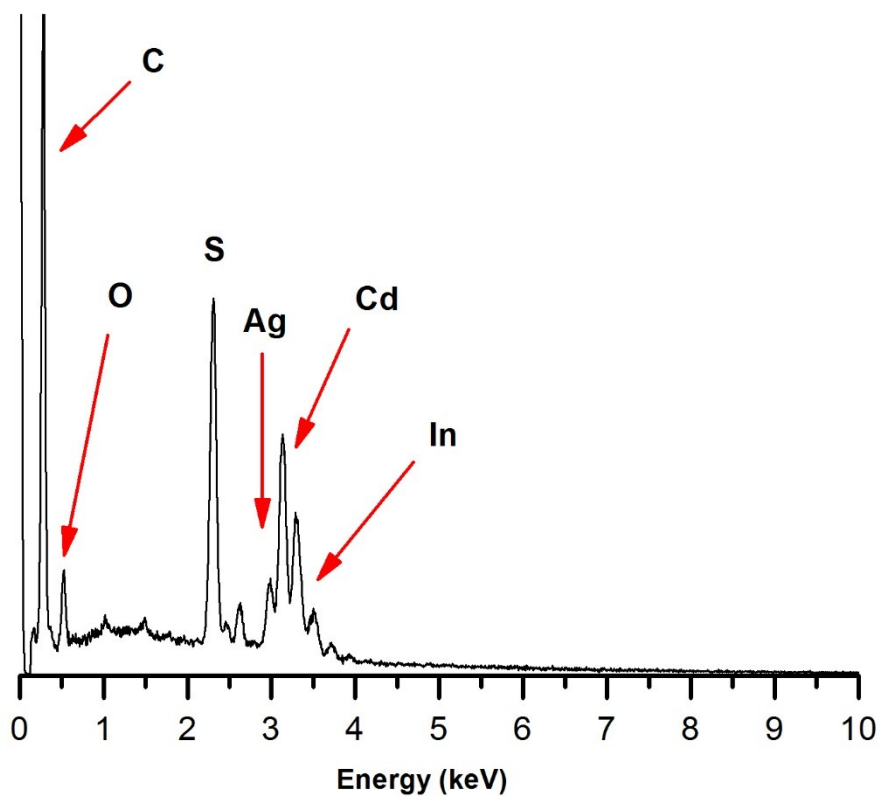

**Fig. S3** Energy-dispersive spectra of Ag-In-S/CdS (**B-1**) nanocrystals.

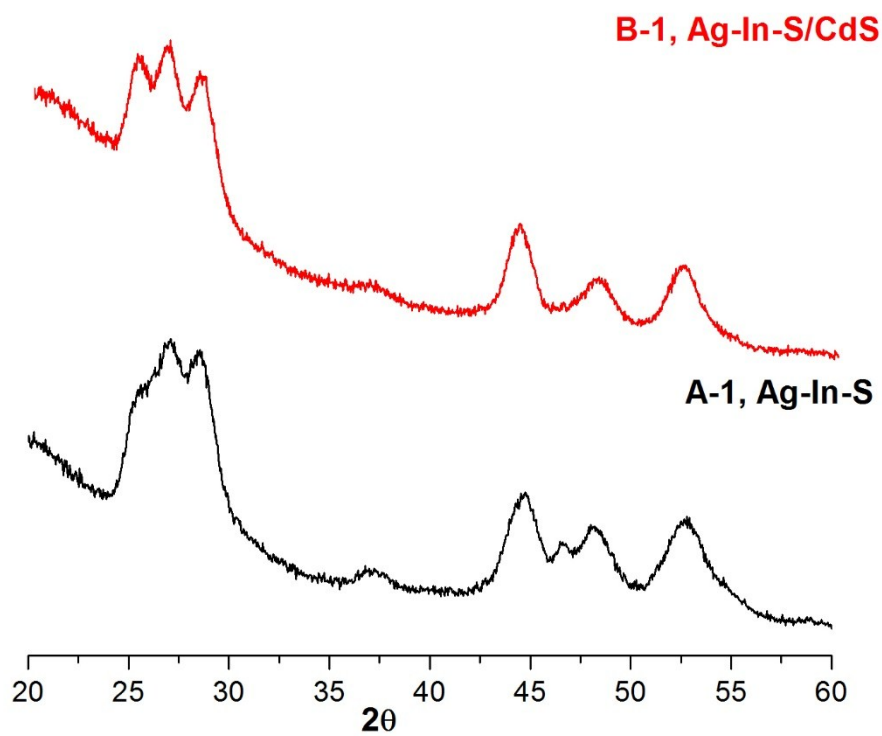

**Fig. S4** X-ray powder diffractograms of Ag-In-S (**A-1**) and Ag-In-S/CdS (**B-1**) nanocrystals.

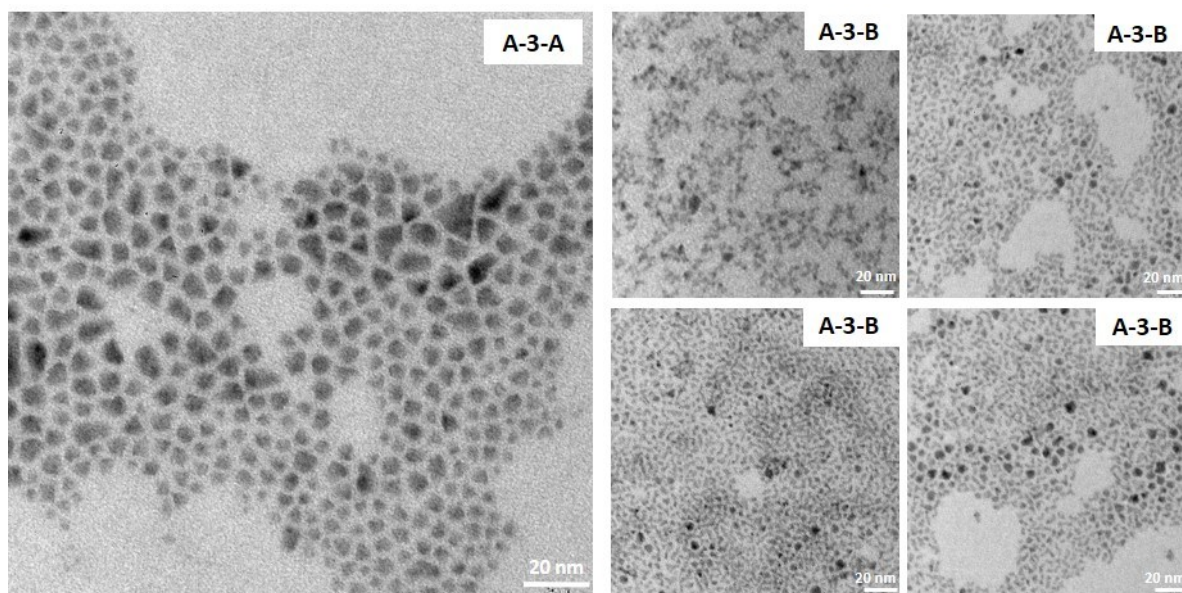

**Fig. S5** TEM images of alloyed Ag-In-Zn-S (**A-3-A** and **A-3-B**) quaternary nanocrystals.

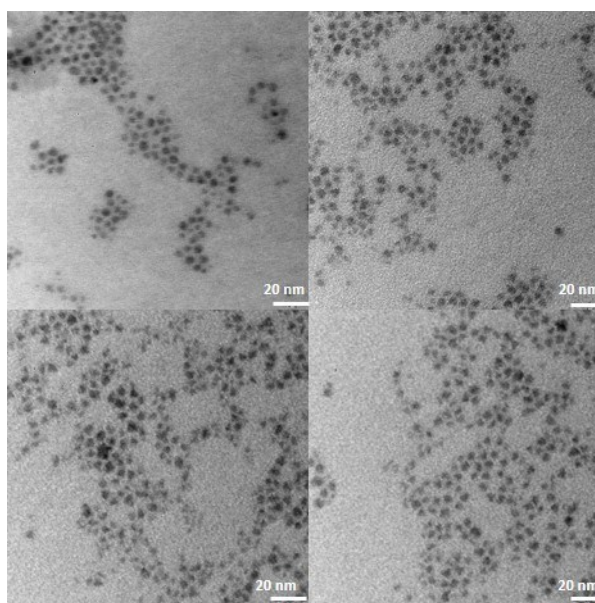

**Fig. S6** TEM images of alloyed Ag-In-Zn-S (**A-3-C**) quaternary nanocrystals.

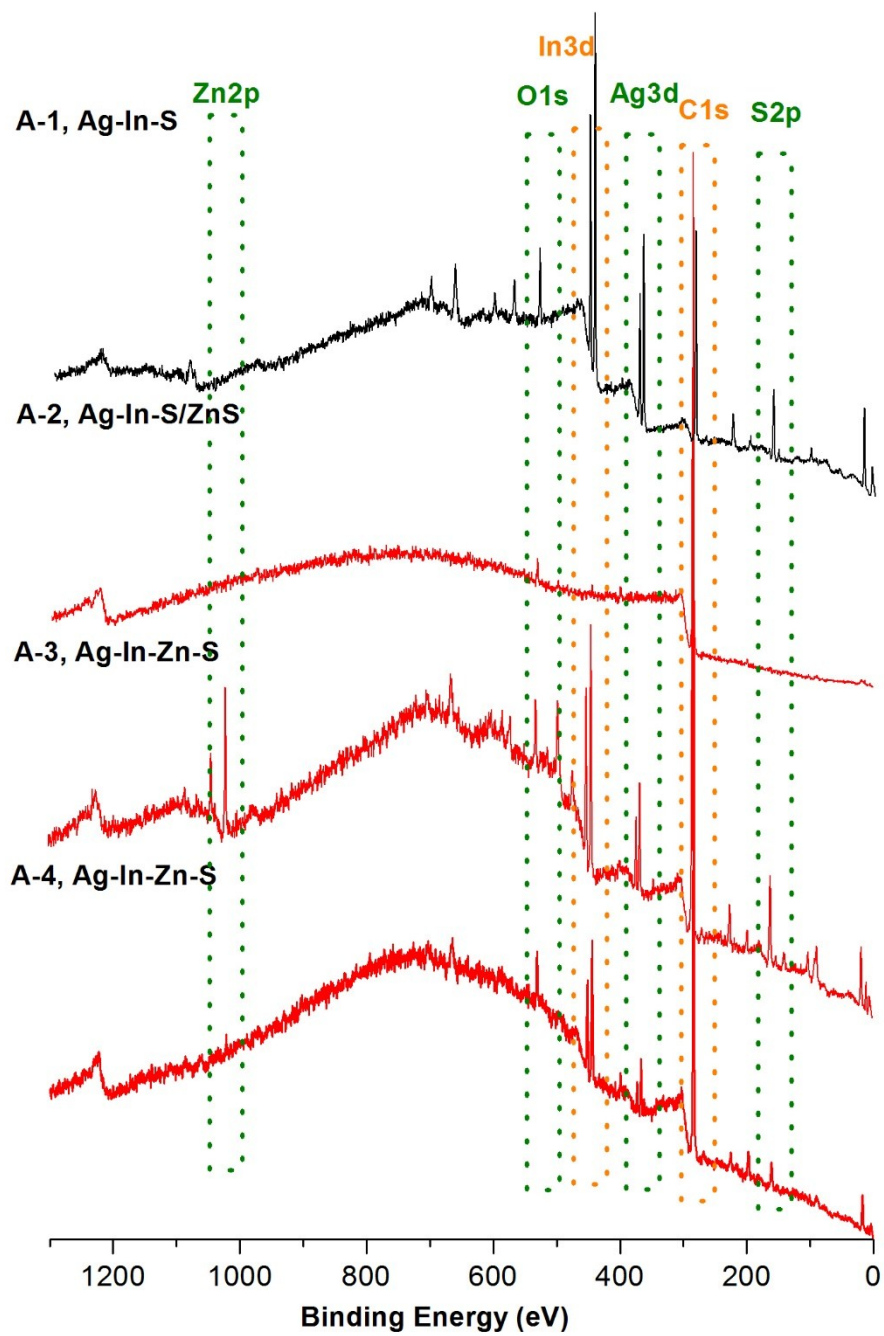

**Fig. S7** XPS survey spectra of Ag-In-S (A-1), Ag-In-S/ZnS (A-2) and Ag-In-Zn-S (A-3 and A-4) nanocrystals.

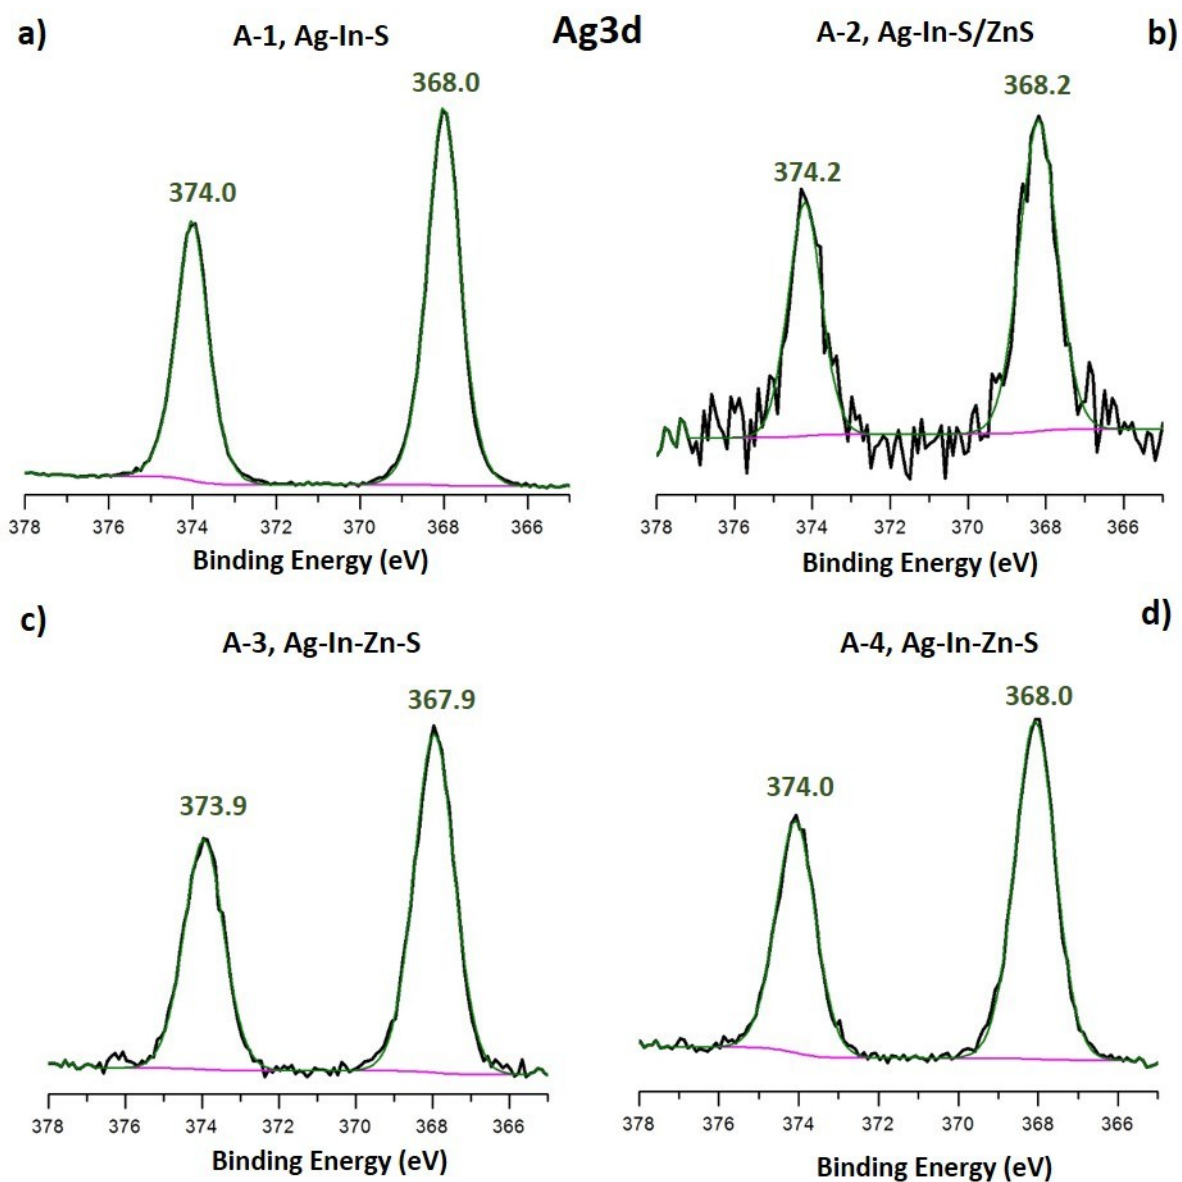

**Fig. S8** High-resolution XPS spectra in the Ag3d range of Ag-In-S (A-1) (a), Ag-In-S/ZnS (A-2) (b) and Ag-In-Zn-S (A-3 and A-4) (c,d) nanocrystals.



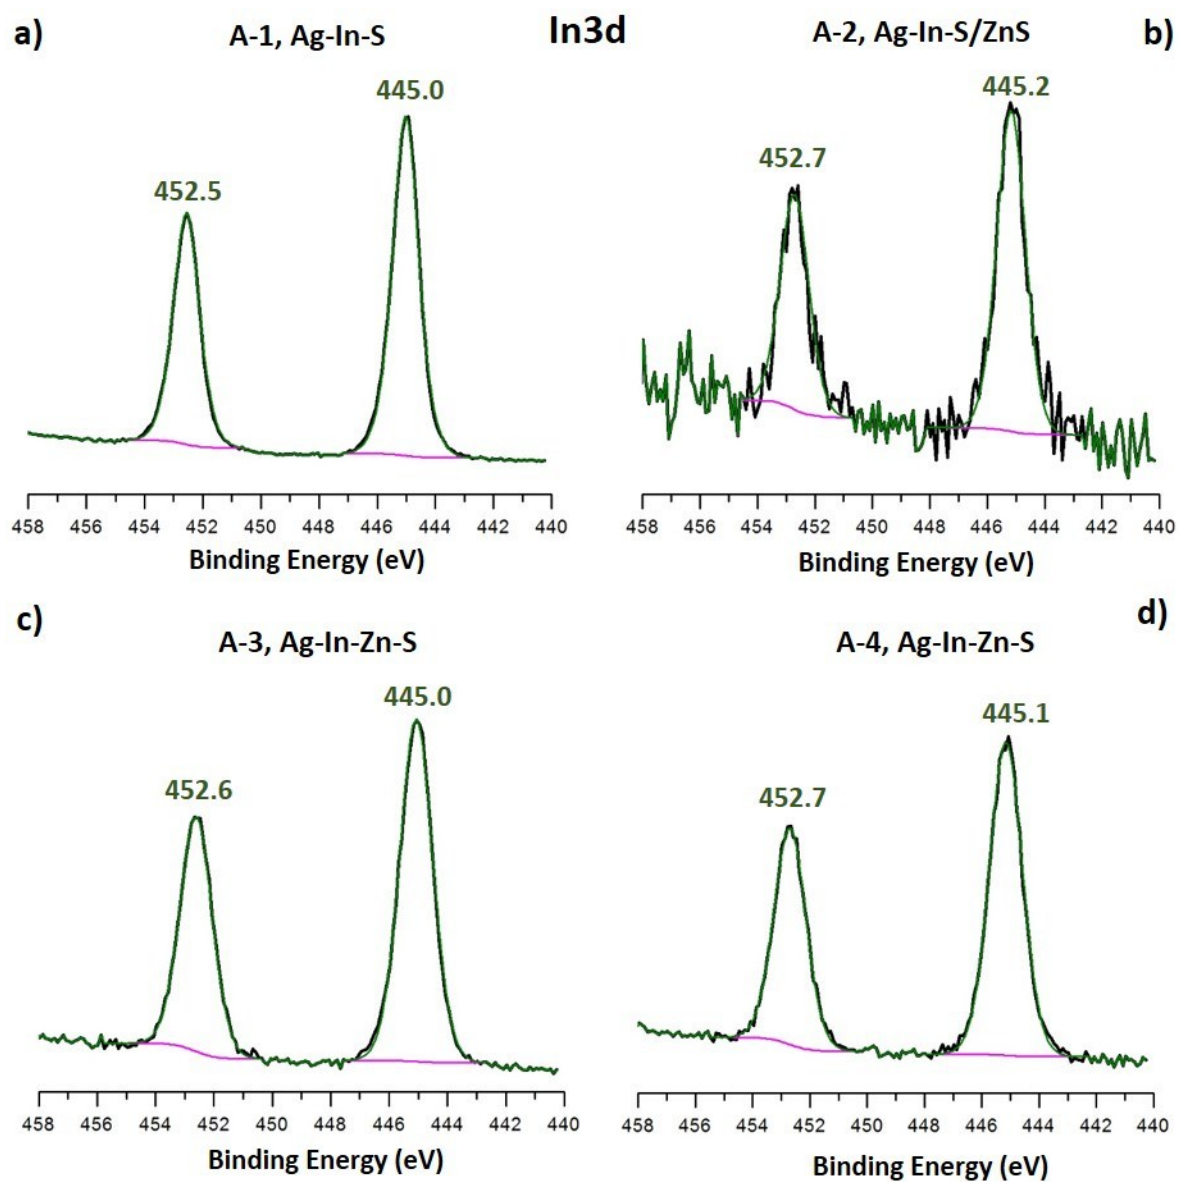

**Fig. S9** High-resolution XPS spectra in the In3d range of Ag-In-S (A-1) (a), Ag-In-S/ZnS (A-2) (b) and Ag-In-Zn-S (A-3 and A-4) (c,d) nanocrystals.



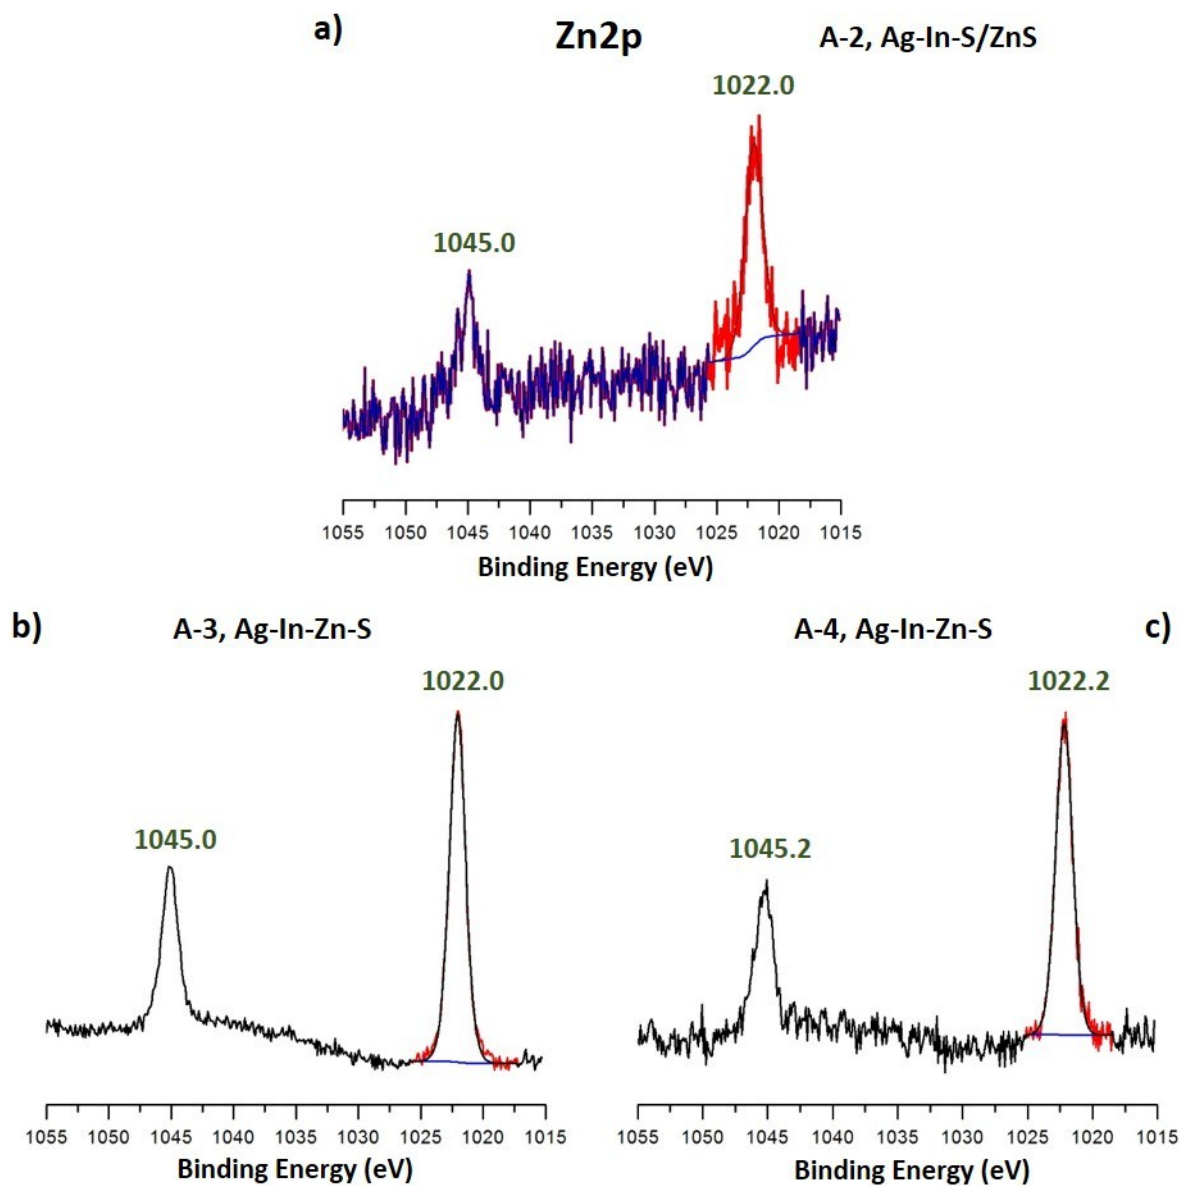

**Fig. S10** High-resolution XPS spectra in the Zn2p range of Ag-In-S/ZnS (A-2) (a) and Ag-In-Zn-S (A-3 and A-4) (b,c) nanocrystals.

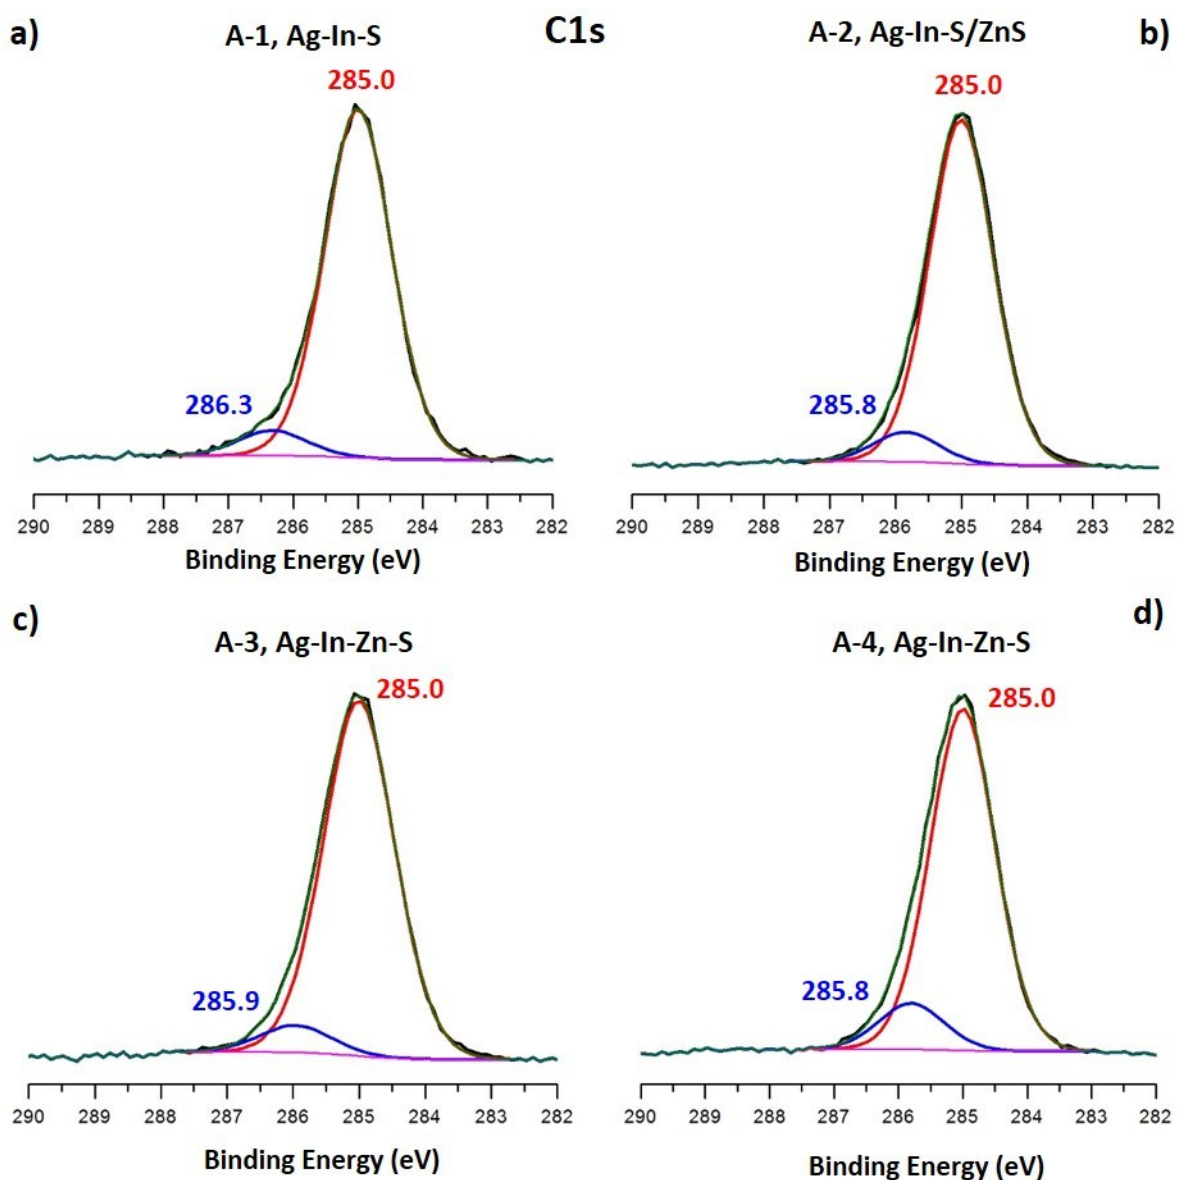

**Fig. S11** High-resolution XPS spectra in the C1s range of Ag-In-S (A-1) (a), Ag-In-S/ZnS (A-2) (b) and Ag-In-Zn-S (A-3 and A-4) (c,d) nanocrystals.

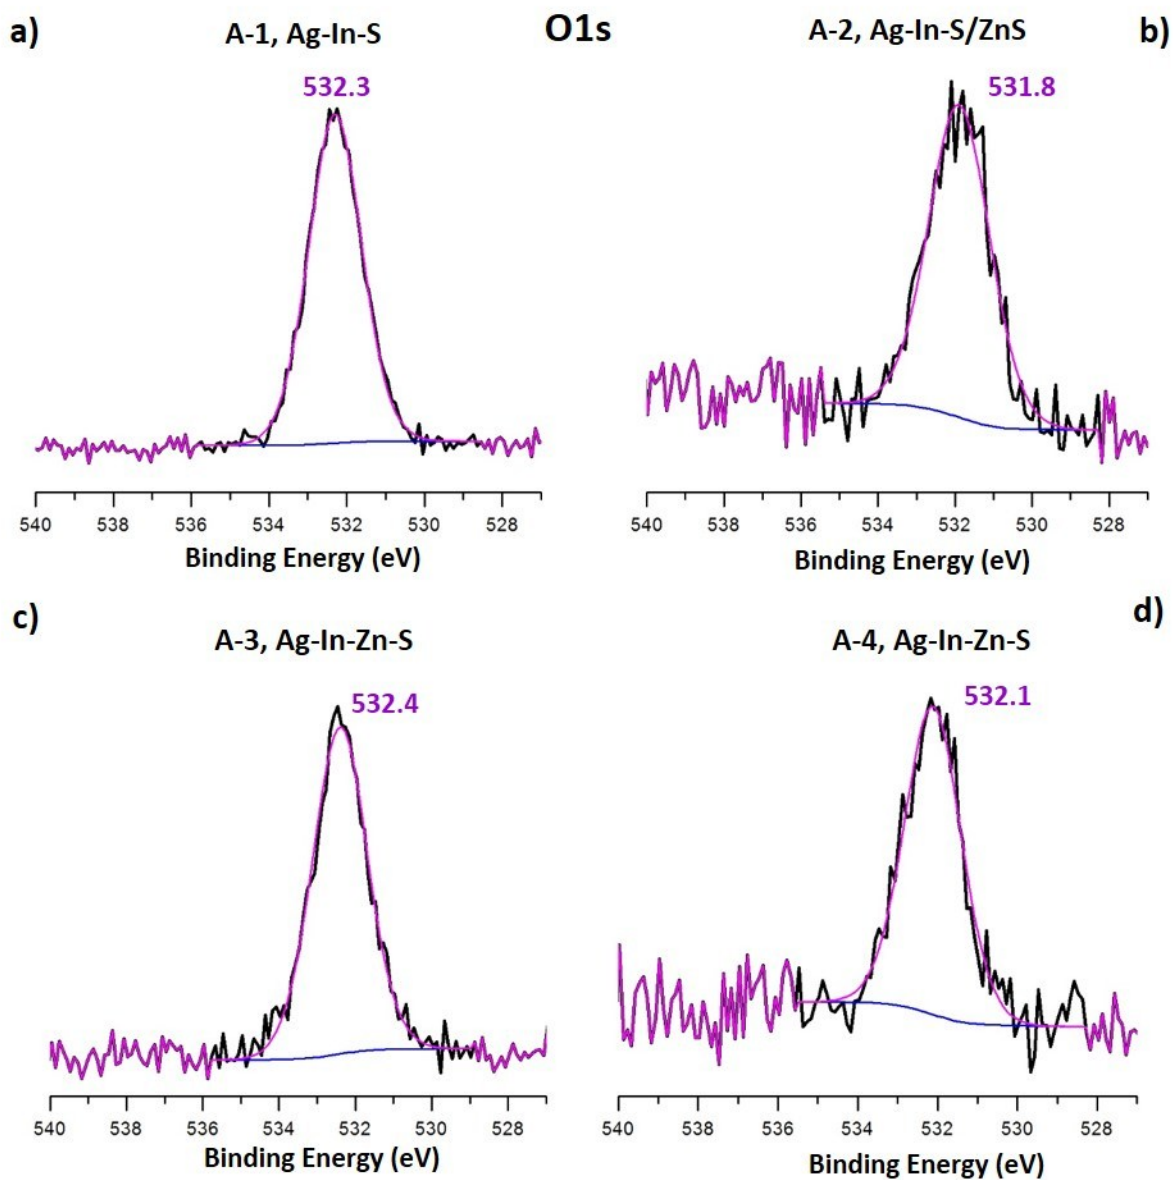

**Fig. S12** High-resolution XPS spectra in the O1s range of Ag-In-S (A-1) (a), Ag-In-S/ZnS (A-2) (b) and Ag-In-Zn-S (A-3 and A-4) (c,d) nanocrystals.

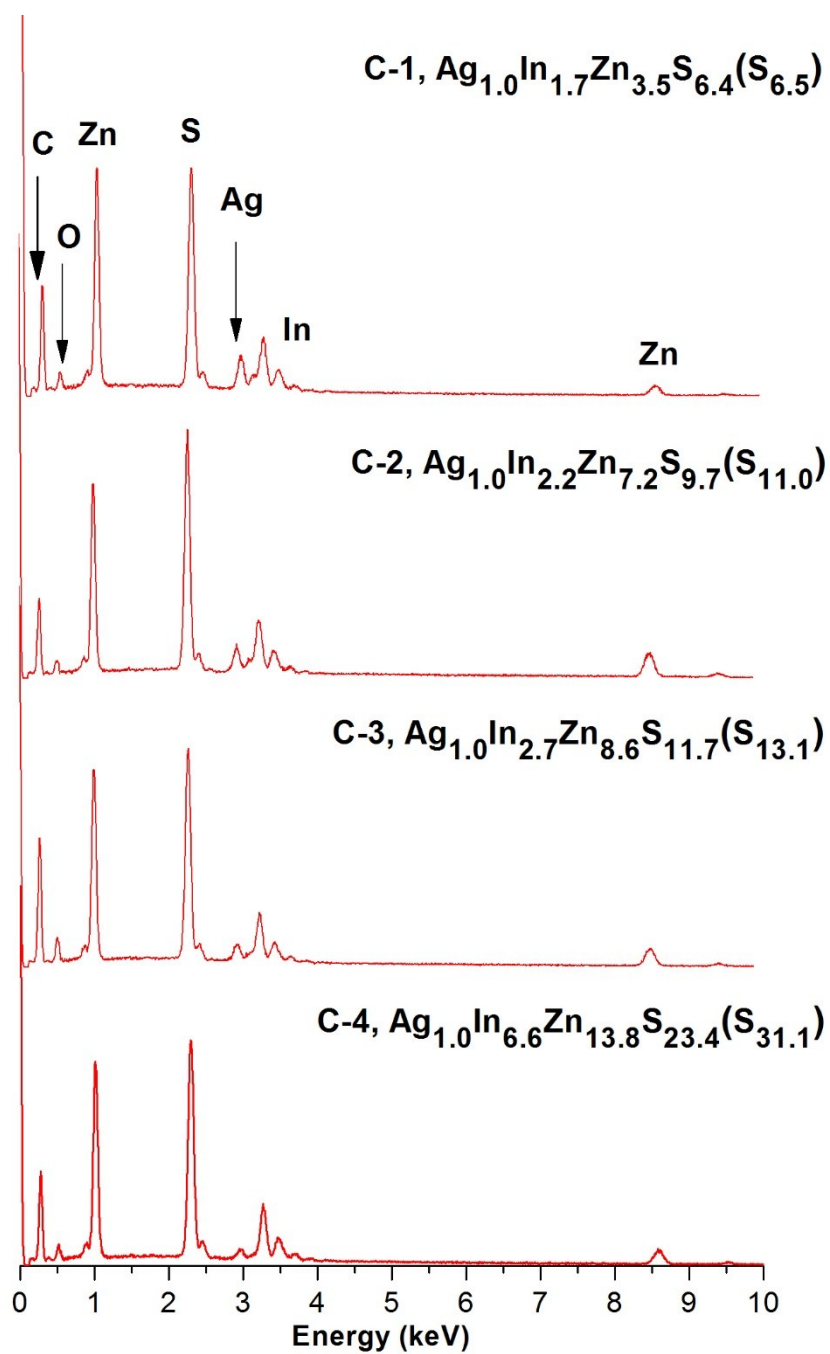

**Fig. S13** Energy-dispersive spectra of alloyed Ag-In-Zn-S quaternary nanocrystals of batches C-(1-4).

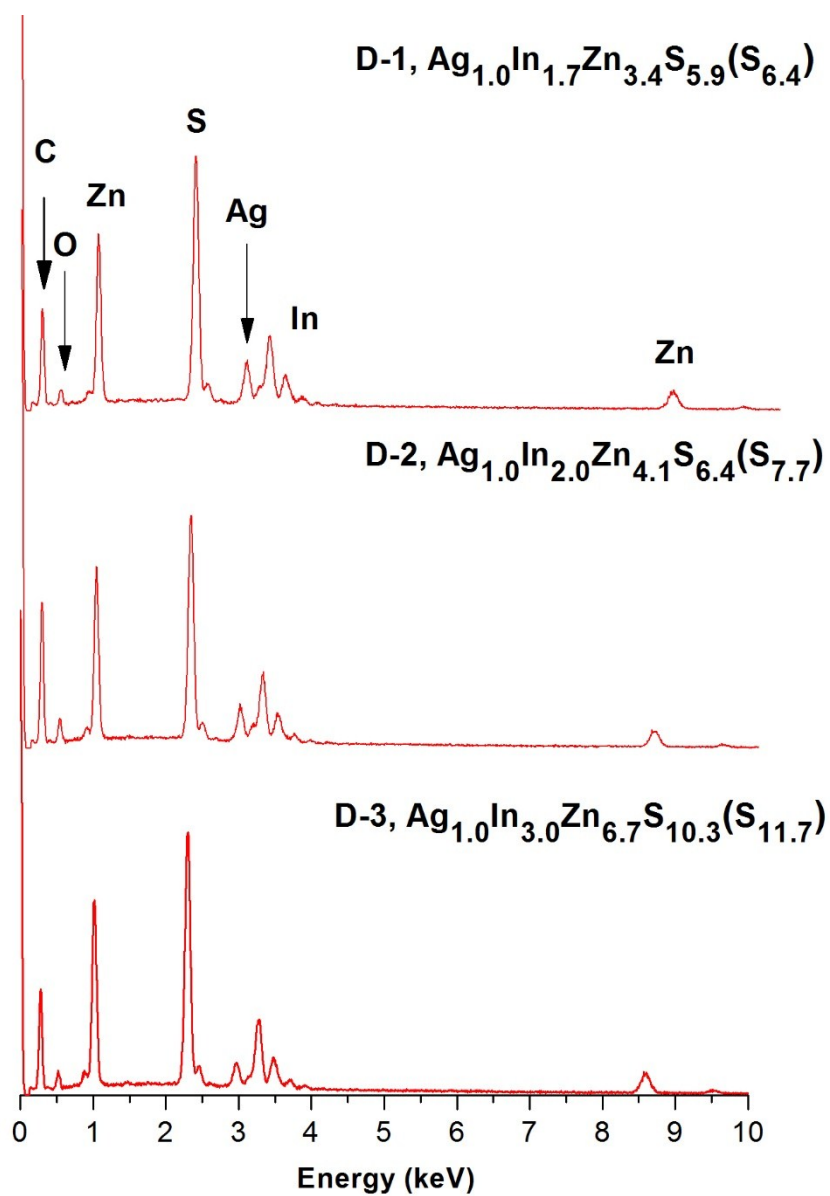

**Fig. S14** Energy-dispersive spectra of alloyed Ag-In-Zn-S quaternary nanocrystals of batches **D-(1-3)**.
